# Supplementary material
Source: PubMed Central journal article supplement (PMC3241764)
Supplement: 1105057108_pnas.1105057108_SI.pdf [file 1105057108_pnas.1105057108_SI.pdf]

# Supporting Information

Hatakeyama et al. 10.1073/pnas.1105057108

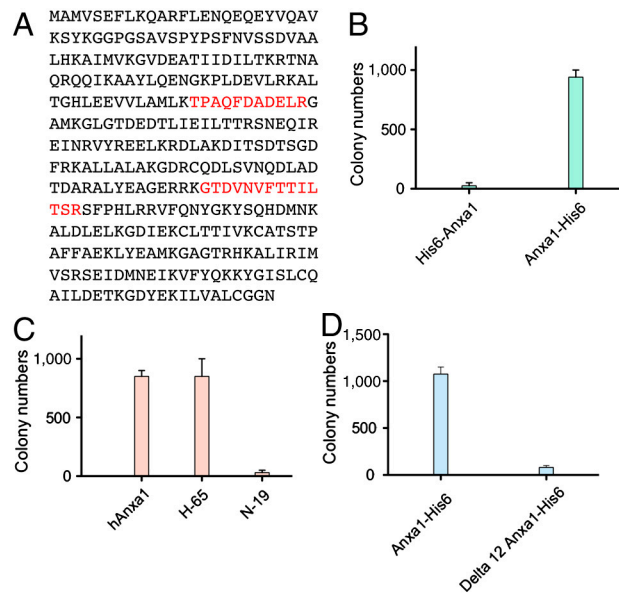

**Fig. S1.** Identification of annexin 1 as IF7 peptide binding peptide. (A) The peptide sequences of the full-length mouse annexin 1 protein and the tryptic peptides identified by proteomics. I-peptide receptor (IPR) proteins, which are responsible for carbohydrate-dependent cancer cell colonization to the lung were purified by an affinity chromatography using carbohydrate-mimicry IELLQAR-peptide (I-peptide) conjugated agarose beads from the rat lung membrane fraction as described previously. The major component was identified as pre-mRNA splicing factor (1). Peptide sequences of the tryptic 15 kDa fragments identified by proteomics analysis are shown by red. (B) Binding of IF7 phage to Anxa1. Recombinant Anxa1 proteins expressed in bacteria were coated on plastic wells, IF7 peptide displaying phage was added, and phage binding to Anxa1 proteins was determined by colony forming assay. Binding of IF7 phage to His<sub>6</sub>-Anxa1 and Anxa1-His<sub>6</sub>. Effect of Anti-Anxa1 antibodies on IF7 phage binding to Anxa1-His<sub>6</sub>. Binding of IF7 phage to wild type Anxa1-His<sub>6</sub> and delta 12 Anxa1-His<sub>6</sub>.

1 Hatakeyama S, et al. (2009) Identification of mRNA splicing factors as the endothelial receptor for carbohydrate-dependent lung colonization of cancer cells. *Proc Natl Acad Sci USA* 106:3095–3100.

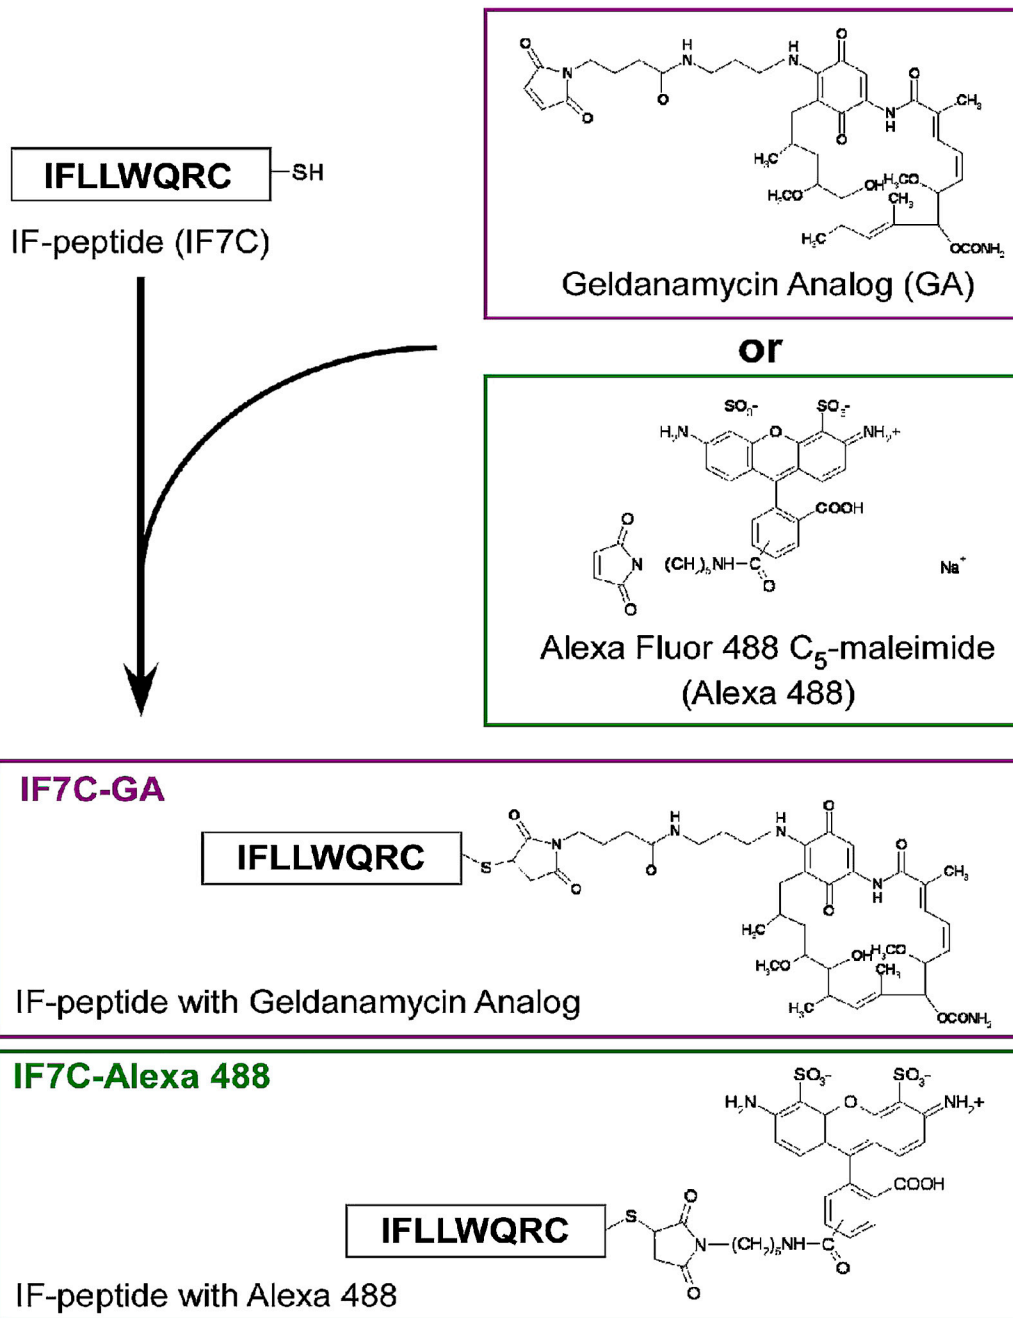

**Fig. S2.** Conjugation of IF7C peptide with GA and with Alexa 488. A geldanamycin analogue, 17-GMB-APA-GA (GA), was purchased from Invivogen (San Diego, CA). GA was also synthesized from geldanamycin (LC labs, Woburn, MA) as described by Mandler, et al. (1). Briefly, GA was dissolved in chloroform and mixed with 1,3-diaminopropane (Sigma-Aldrich) under argon gas at room temperature for 20 h. Diaminopropane cross-linked GA was precipitated with hexane. The precipitate was dissolved in chloroform, and was reacted with N-[g-maleimidobutyryloxy] succinimide ester (Pierce, Rockford, IL) at room temperature for 2 h. The product or 17-GMB-APA-GA was purified by thin layer chromatography using preparative TLC plate (1.5 mm silica gel, Analtech, Newark, DE) in solvent system, dichloromethane: methanol (92:8, vol/vol). The structure of 17-GMB-APA-GA was verified by ESI mass spectrometry (Micromass ZQ) with MASSLYNX ver3.5 (Waters Corp., Milford, MA). To conjugate IF7C peptide with 17-GMB-APA-GA, they were dissolved in methanol at 1:1 molar ratio. Equal volume of purified water was added for the mixture, and was left at room temperature for 2 h. The product, IF7C-GA, was purified by C18 reverse-phase HPLC column (10 × 150 mm) by gradient elution from 40% to 50% acetonitrile in water containing 0.1% (vol/vol) trifluoroacetic acid at a flow rate of 2.5 mL/min. The purity and structure of IF7C-GA was assessed by ESI mass spectrometry. IF7C was also conjugated with Alexa fluor 488 C<sub>5</sub>-maleimide (Invitrogen, Carlsbad, CA) and purified by HPLC in a similar manner as described above.

1 Mandler R, et al. (2000) Immunoconjugates of geldanamycin and anti-HER2 monoclonal antibodies: antiproliferative activity on human breast carcinoma cell lines. *J Natl Cancer Inst* 92:1573–1581.





pads of SCID mice. On day seven, each mouse was injected intravenously with the compounds as in A–a, and injections performed every 4 days, for a total of four injections, until day 22. Mice were euthanized on day 28 and tumors weighed. Asterisks show statistical significance (Mann-Whitney's U test). (B) Histology of tumors from the mice intravenously injected with the compounds shown in (A). Apoptotic tumor cells along blood vessels in transplanted tumors were detected by TUNEL assay. B16 melanoma (a), LLC lung carcinoma (b), PC3 prostate tumor (c) and MDA-MB-231 breast tumor (d) from mice treated with each compound. Note that perivascular cancer cells rarely show apoptosis in control IF7, and GA groups, while perivascular tumor cells in the IF7-GA groups show greater numbers of apoptotic cells. (Scale bar, 50  $\mu$ m).

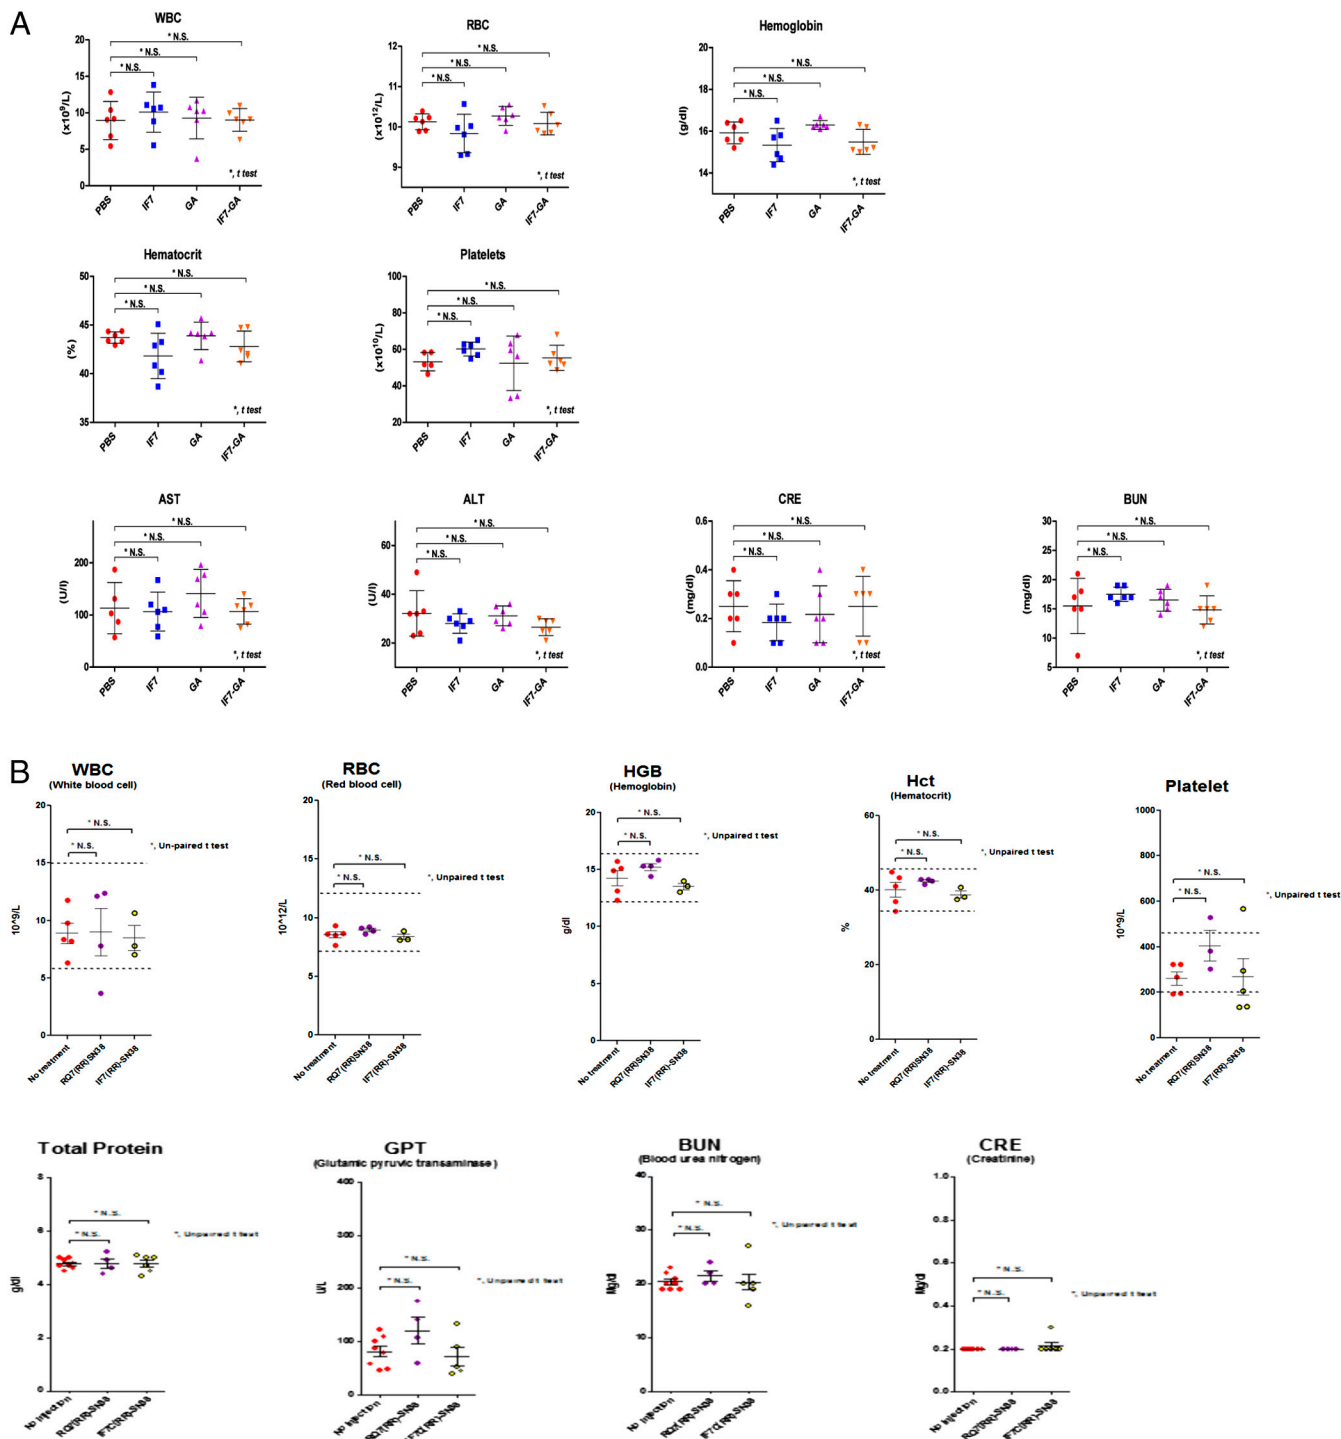

**Fig. 55.** Blood test of mice subjected to intravenous injection of IF7-GA and IF7C(RR)-SN38. (A) Blood test of mice injected with IF7-GA. (B) Blood test of mice injected with IF7C(RR)-SN38. WBC, white blood cells; RBC, red blood cells; AST, aspartate aminotransferase to evaluate liver function; ALT, alanine transaminase to evaluate liver function; CRE, creatine to evaluate kidney function; BUN blood urea to evaluate kidney function. Statistical analysis unpaired *t*-test was applied. \*N.S.: statistically not significant.

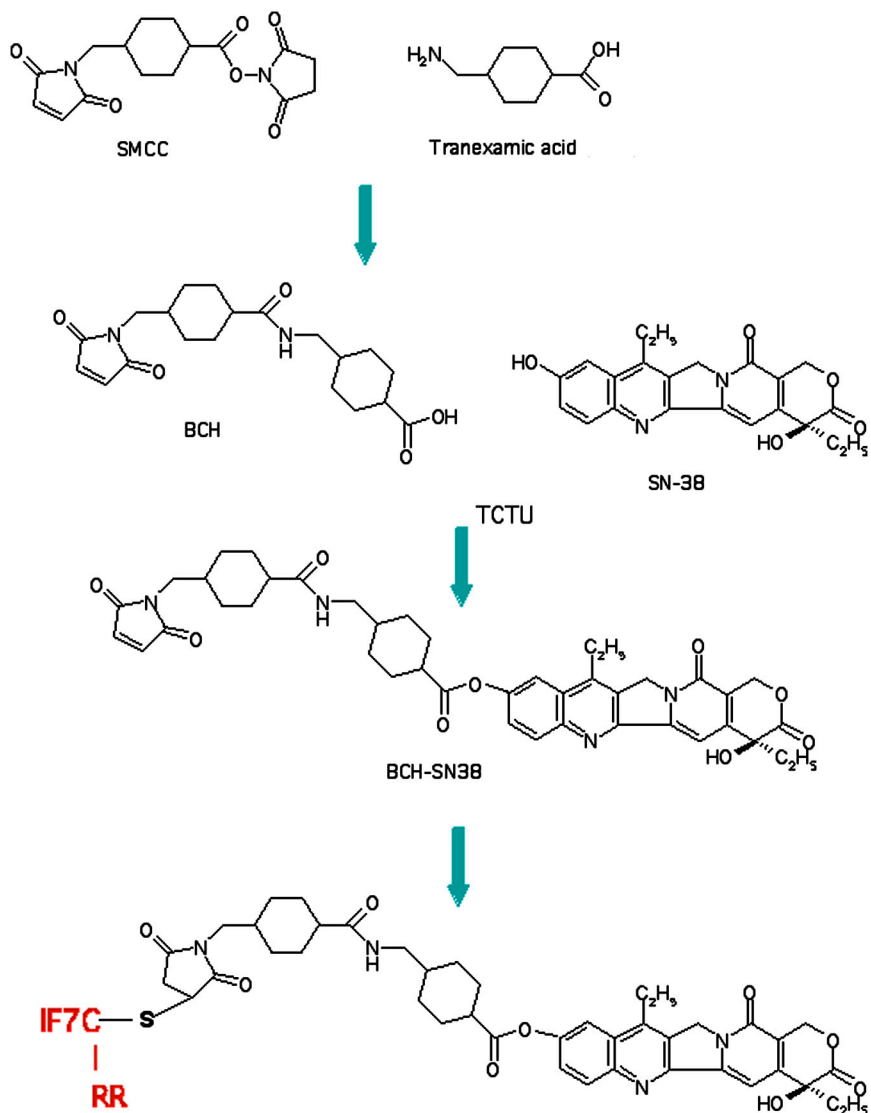

**Fig. S6.** Conjugation of IF7C(RR) with SN-38. Conjugation of IF7C(RR) with SN-38 followed the method described by Meyer-Losic F, et al (1) with modifications. Details are described in main body text under *Materials and Methods*.

1 Meyer-Losic F, et al. (2008) DTS-108, a novel peptidic prodrug of SN38: in vivo efficacy and toxicokinetic studies. *Clin Cancer Res* 14:2145–2153.
